# Supplementary material for: Anti-Inflammatory Activity of Glycolipids and a Polyunsaturated Fatty Acid Methyl Ester Isolated from the Marine Dinoflagellate Karenia mikimotoi
Source: PubMed Central journal article supplement (PMC7143331; doi:10.3390/md18030138), 2020-02-27

# Supporting Information

## **Glycolipids and a Polyunsaturated Fatty Acid Methyl Ester Isolated from the Marine Dinoflagellate *Karenia mikimotoi***

Alain S. Leutou, Jennifer R. McCall, Bob York, Rajeshwar R. Govindapur and Andrea J. Bourdelais \*

Center for Marine Science, University of North Carolina at Wilmington, 5600 Marvin K. Moss Lane, USA; leutoualain@yahoo.fr, (A.S.L.); mccalljr@uncw.edu (J.R.M.); yorkra@uncw.edu (B.Y.); govindapur@uncw.edu (R.R.G.)

\*A. J. B. Tel: +1-910-431-3645. E-mail: [bourdelaisa@uncw.edu](mailto:bourdelaisa@uncw.edu).

## Table of Contents

|                                                                                                                                                   |            |
|---------------------------------------------------------------------------------------------------------------------------------------------------|------------|
| <b>Figure S1.</b> $^1\text{H}$ NMR Spectrum (500 MHz) of Monogalactosyldiacylglycerol ( <b>1</b> ) in $\text{CD}_3\text{OD}$ .....                | <b>S3</b>  |
| <b>Figure S2.</b> $^{13}\text{C}$ NMR Spectrum (125 MHz) of Monogalactosyldiacylglycerol ( <b>1</b> ) in $\text{CD}_3\text{OD}$ .....             | <b>S4</b>  |
| <b>Figure S3.</b> DEPT-135 (125 MHz) of Monogalactosyldiacylglycerol ( <b>1</b> ) in $\text{CD}_3\text{OD}$ .....                                 | <b>S5</b>  |
| <b>Figure S4.</b> COSY Spectra (500 MHz) of Monogalactosyldiacylglycerol ( <b>1</b> ) in $\text{CD}_3\text{OD}$ .....                             | <b>S6</b>  |
| <b>Figure S5.</b> HSQC Spectra (500 MHz) of of Monogalactosyldiacylglycerol ( <b>1</b> ) in $\text{CD}_3\text{OD}$ .....                          | <b>S7</b>  |
| <b>Figure S6.</b> HMBC Spectra (500 MHz) of of Monogalactosyldiacylglycerol ( <b>1</b> ) in $\text{CD}_3\text{OD}$ .....                          | <b>S8</b>  |
| <b>Figure S7.</b> HRMSESITOF of Monogalactosyldiacylglycerol ( <b>1</b> ) .....                                                                   | <b>S9</b>  |
| <b>Figure S8.</b> IR Spectra of Monogalactosyldiacylglycerol ( <b>1</b> ) .....                                                                   | <b>S10</b> |
| <b>Figure S9.</b> Fragmentation ESI-MS of the monogalactosyldiacylglycerol ( <b>1</b> ) .....                                                     | <b>S11</b> |
| <b>Figure S10.</b> $^1\text{H}$ NMR Spectrum (500 MHz) of Monogalactosylmonoacylglycerol ( <b>2</b> ) in $\text{CD}_3\text{OD}$ .....             | <b>S12</b> |
| <b>Figure S11.</b> $^{13}\text{C}$ NMR Spectrum (125 MHz) of Monogalactosylmonoacylglycerol ( <b>2</b> ) in $\text{CD}_3\text{OD}$ .....          | <b>S13</b> |
| <b>Figure S12.</b> HRMSESITOF of Monogalactosylmonoacylglycerol ( <b>2</b> ) .....                                                                | <b>S14</b> |
| <b>Figure S13.</b> $^1\text{H}$ NMR Spectrum (500 MHz) of Polyunsaturated fatty acid methyl ester ( <b>3</b> ) in $\text{CD}_3\text{OD}$ .....    | <b>S15</b> |
| <b>Figure S14.</b> $^{13}\text{C}$ NMR Spectrum (125 MHz) of Polyunsaturated fatty acid methyl ester ( <b>3</b> ) in $\text{CD}_3\text{OD}$ ..... | <b>S16</b> |
| <b>Figure S15.</b> HRMSESITOF of Polyunsaturated fatty acid methyl ester ( <b>3</b> ) .....                                                       | <b>S17</b> |

**Figure S1.**  $^1\text{H}$  NMR Spectrum (500 MHz) of Monogalactosyldiacylglycerol (**1**) in  $\text{CD}_3\text{OD}$

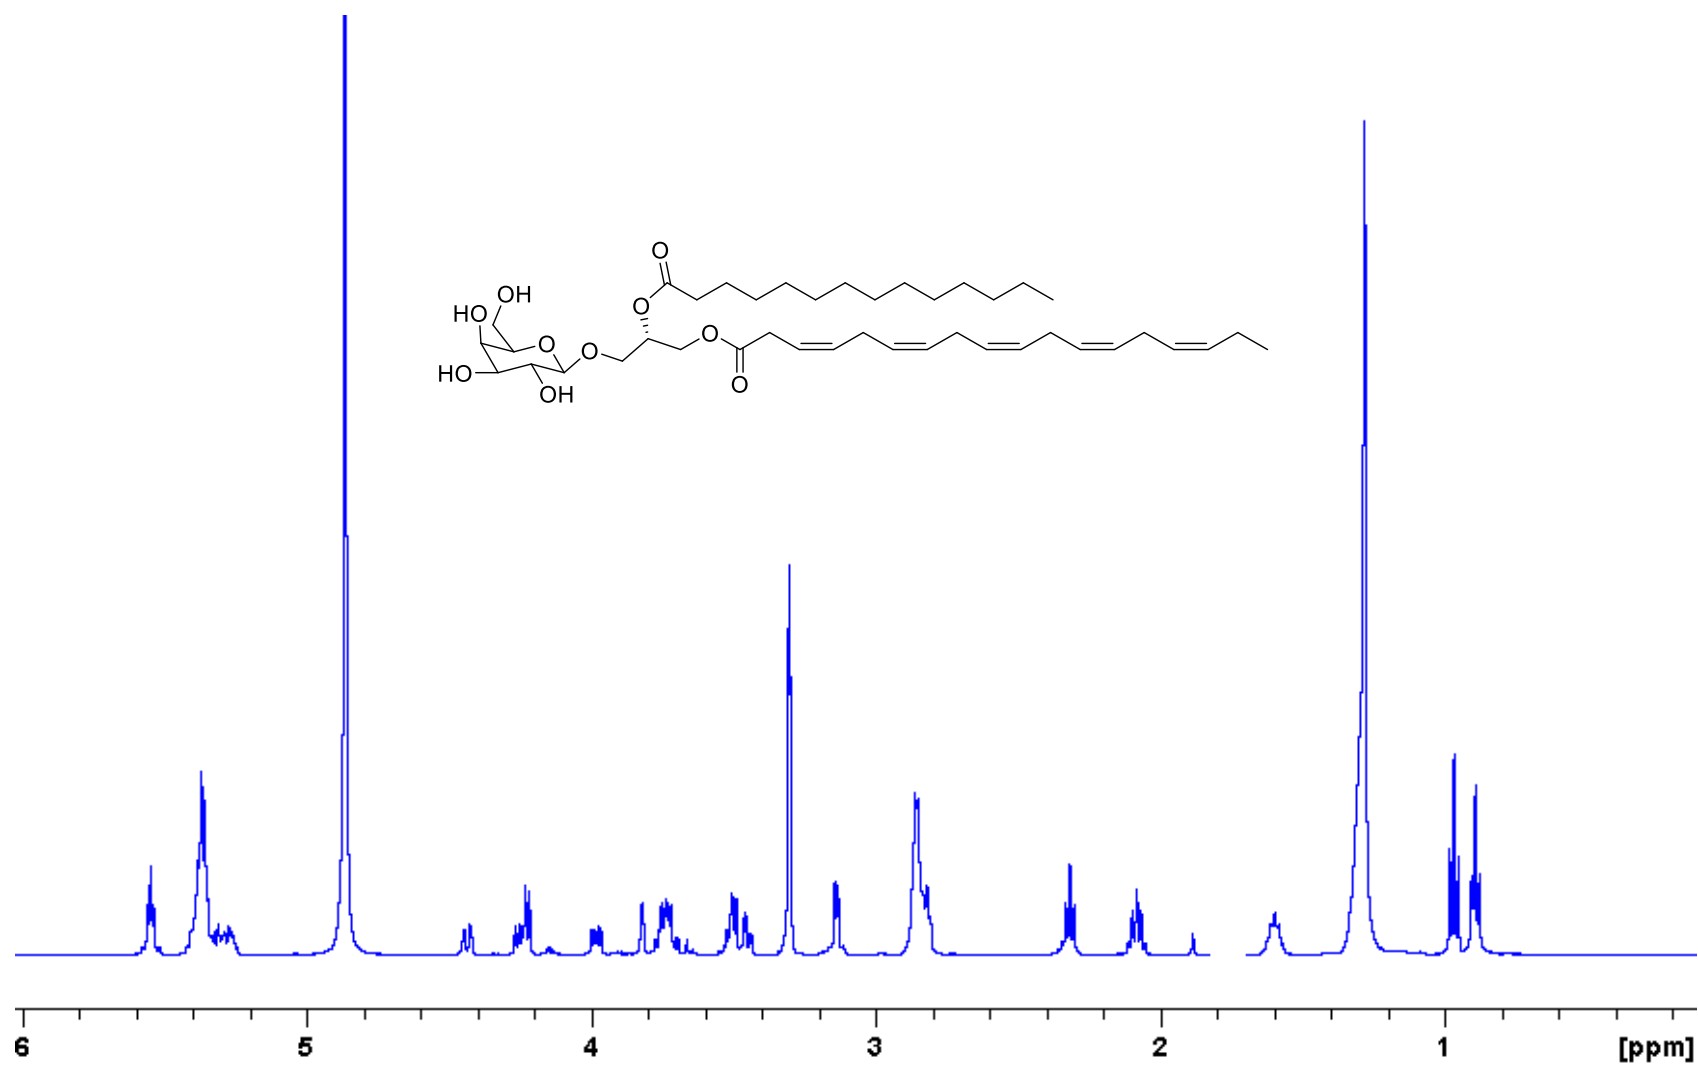

**Figure S2.**  $^{13}\text{C}$  NMR Spectrum (125 MHz) of Monogalactosyldiacylglycerol (**1**) in  $\text{CD}_3\text{OD}$

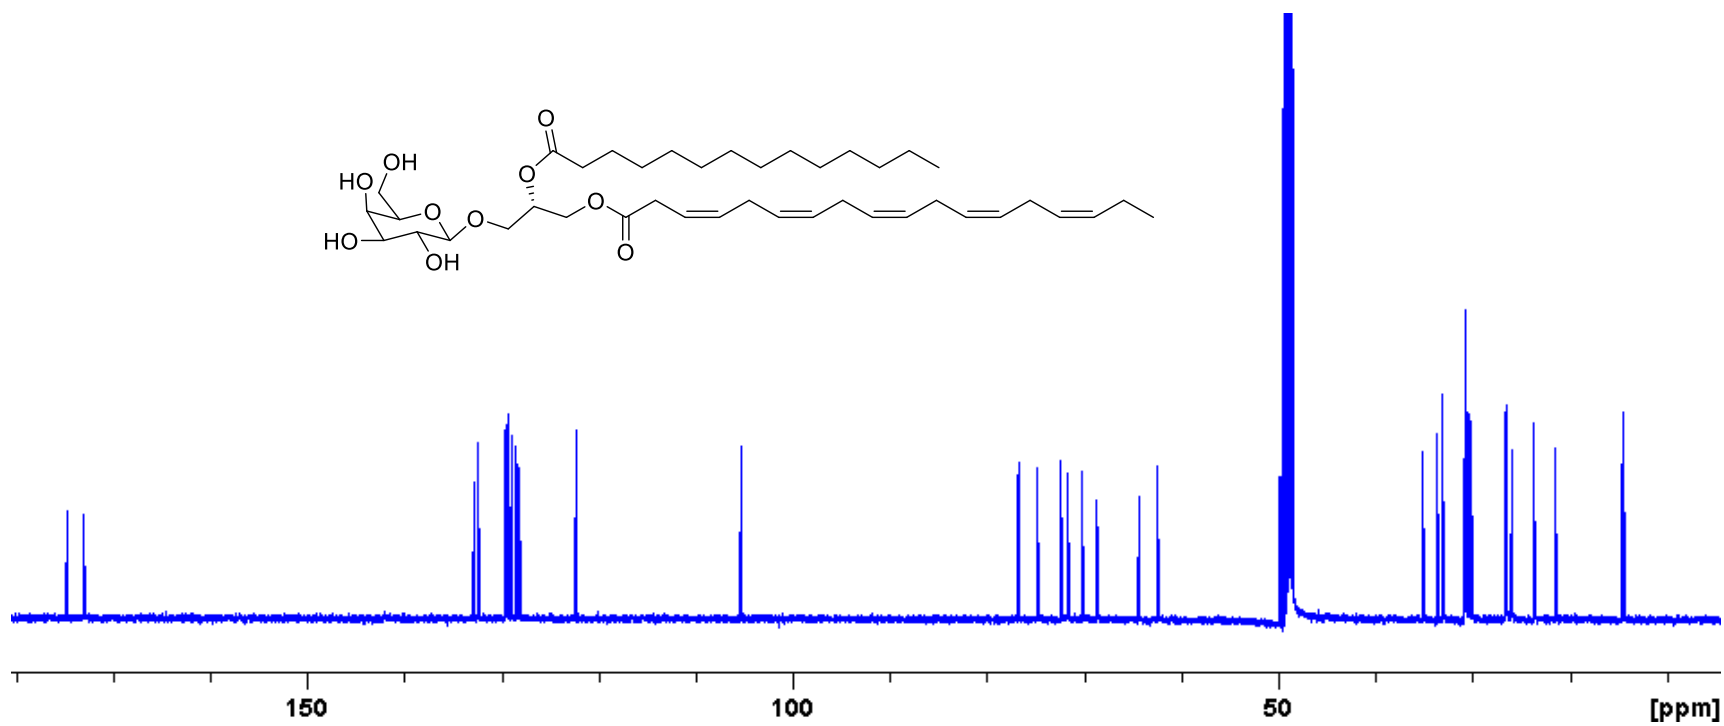

**Figure S3.** DEPT-135 (125 MHz) of Monogalactosyldiacylglycerol (**1**) in CD<sub>3</sub>OD

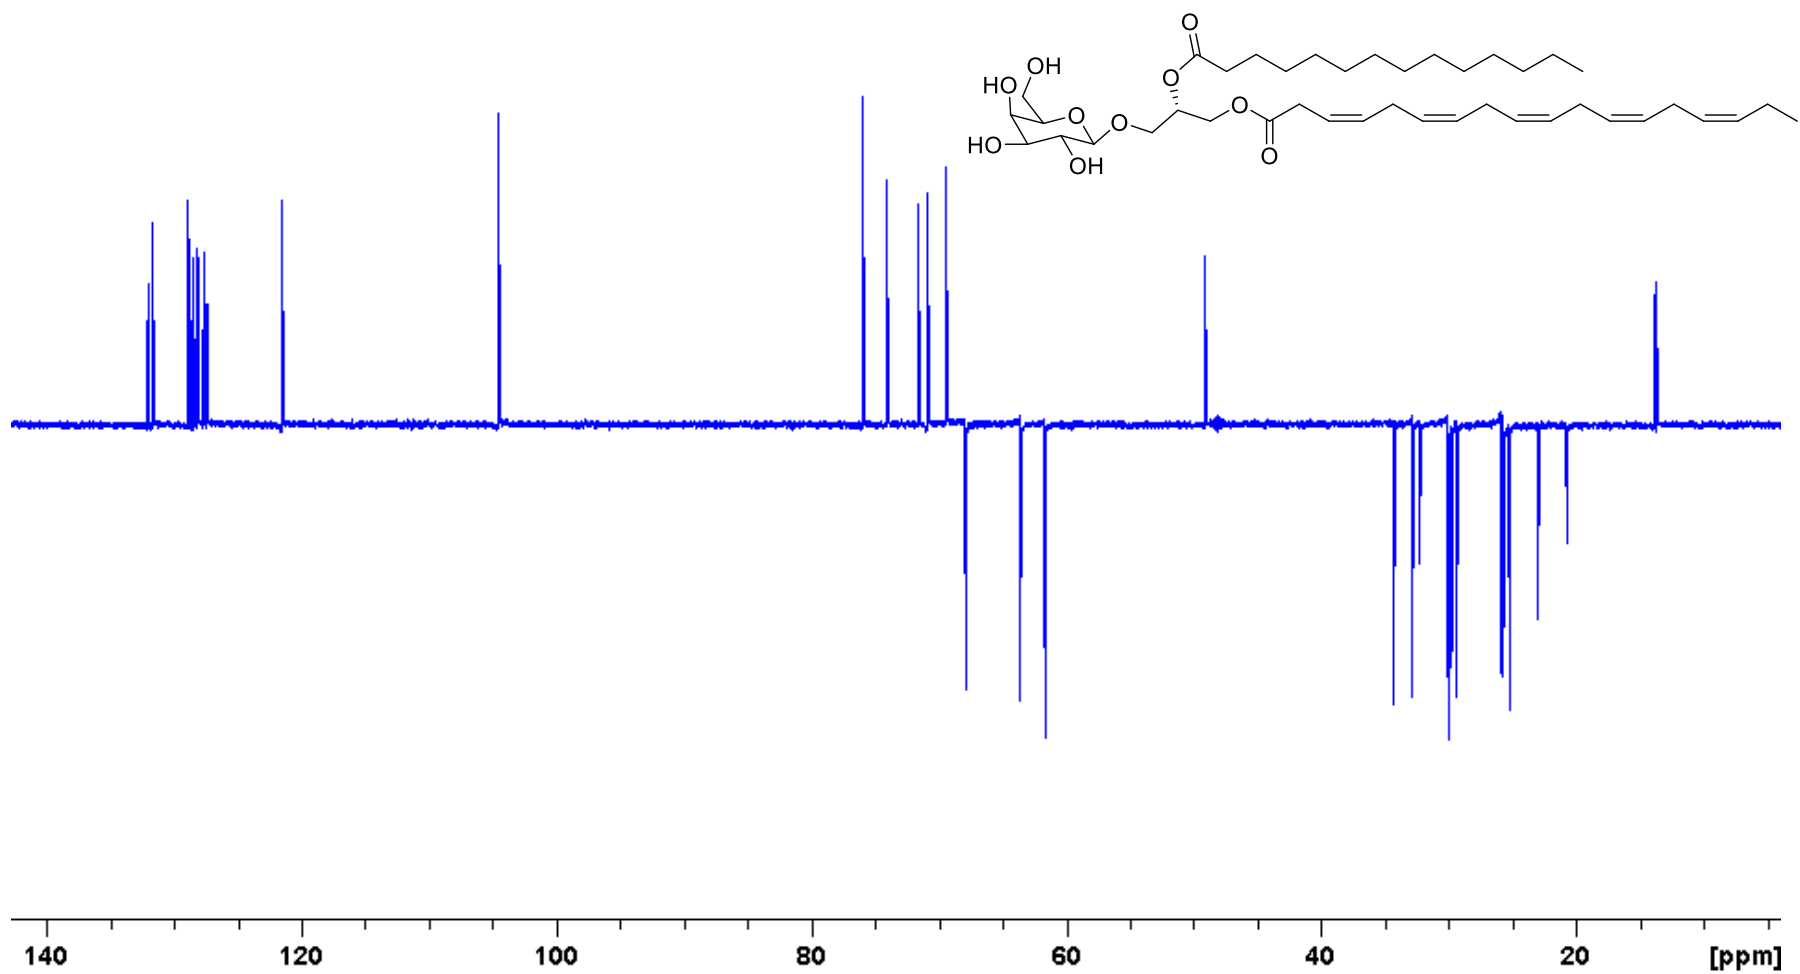

**Figure S4.** COSY Spectra (500 MHz) of Monogalactosyldiacylglycerol (**1**) in CD<sub>3</sub>OD

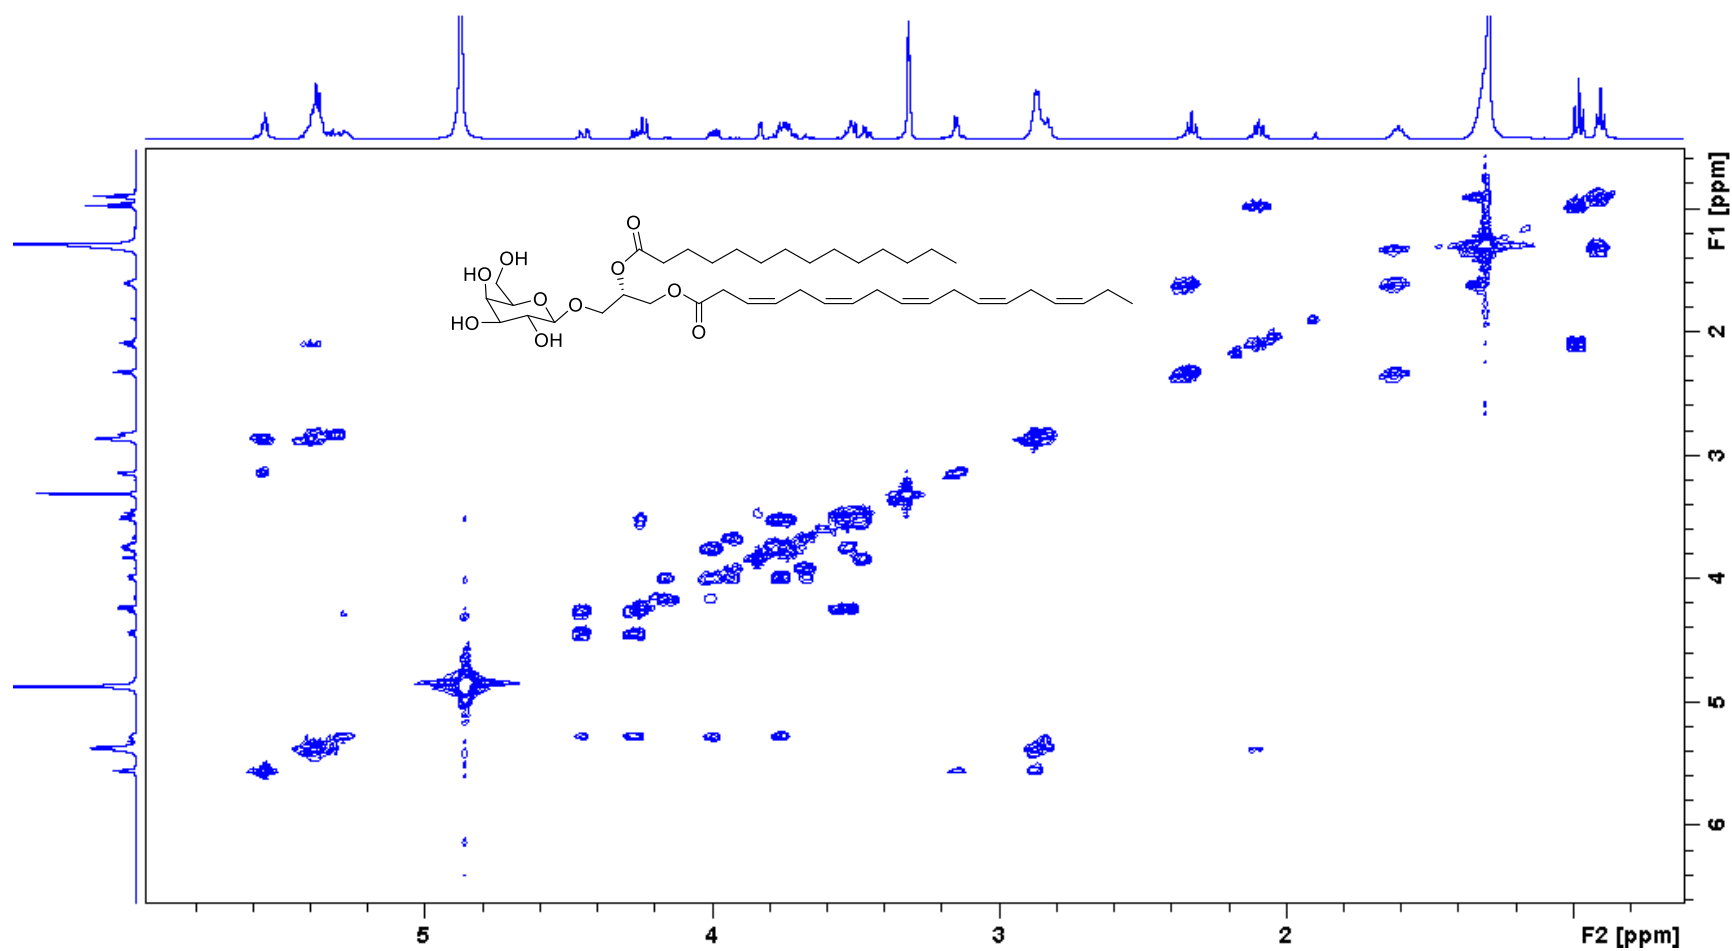

**Figure S5.** HSQC Spectra (500 MHz) of of Monogalactosyldiacylglycerol (**1**) in CD<sub>3</sub>OD

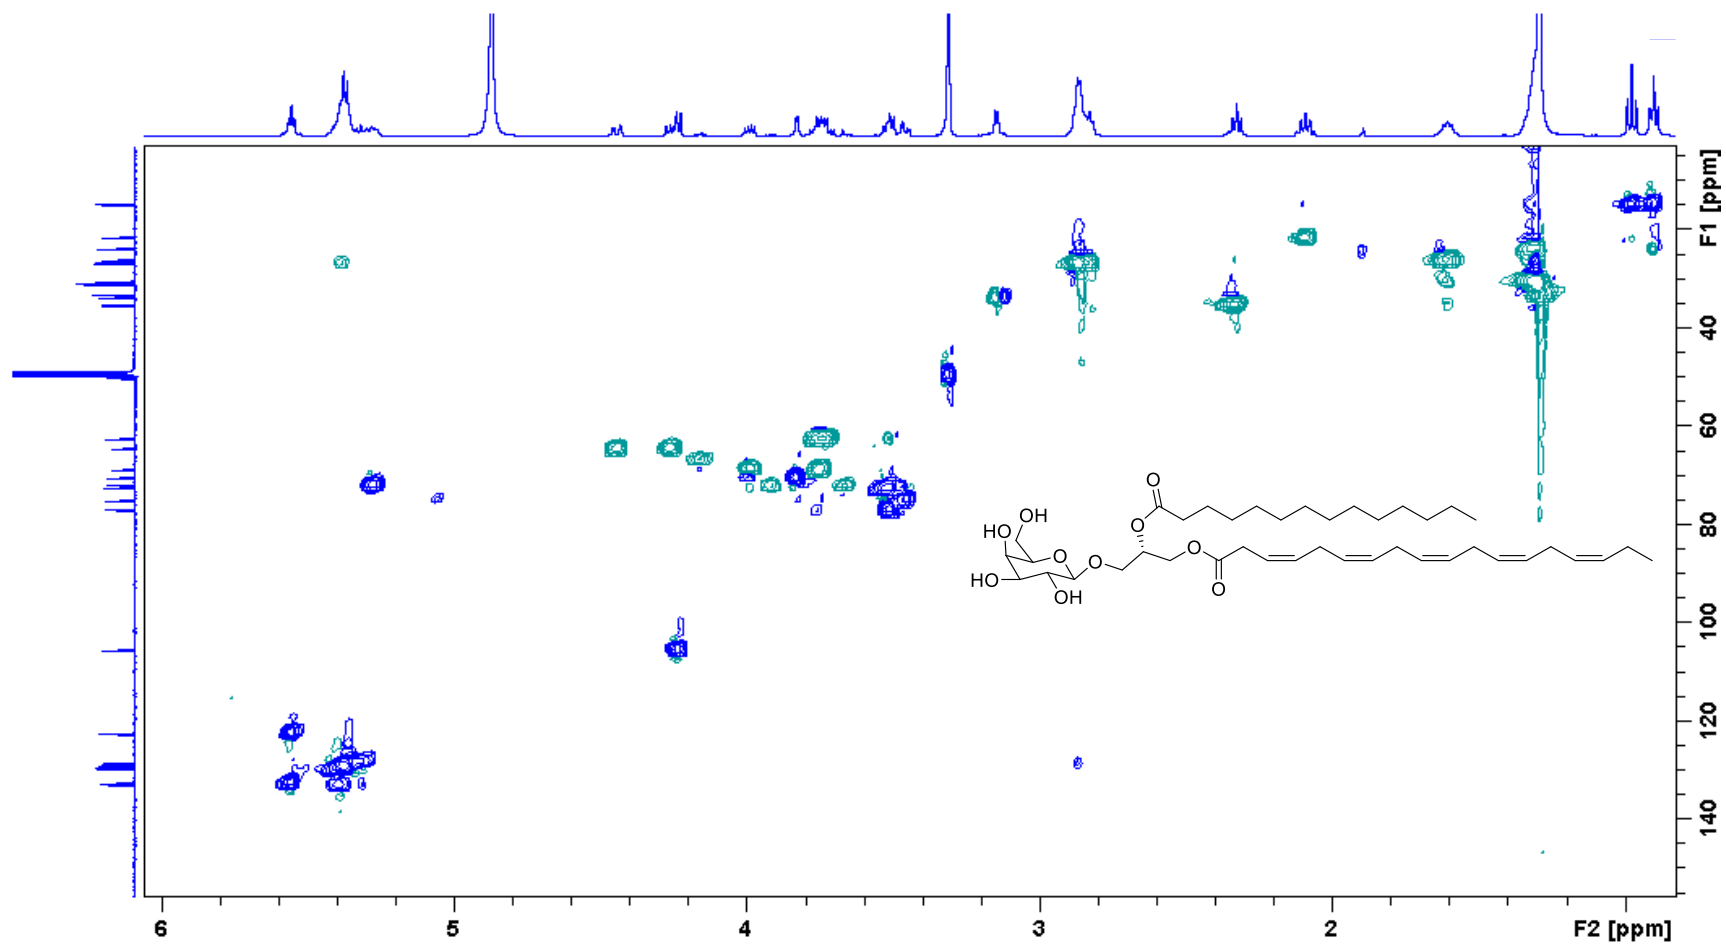

**Figure S6.** HMBC Spectra (500 MHz) of of Monogalactosyldiacylglycerol (**1**) in CD<sub>3</sub>OD

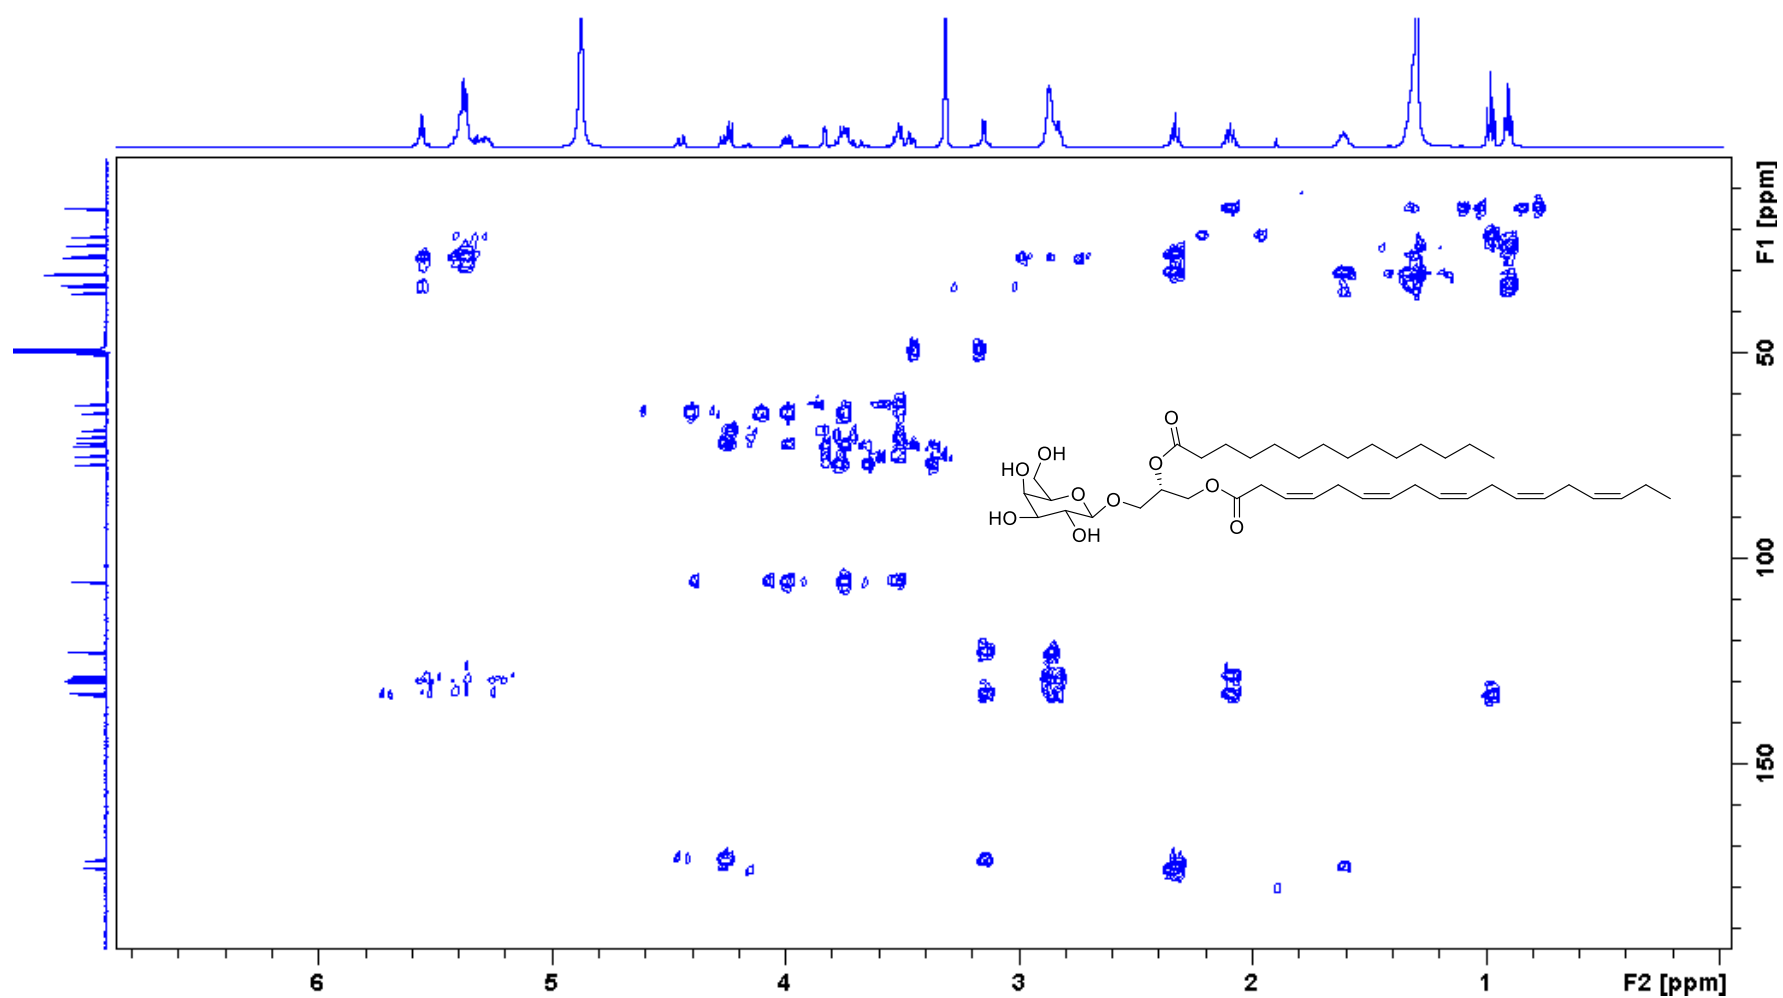



**Figure S7. HRMS/ESITOF of Monogalactosyldiacylglycerol (1)**

**Single Mass Analysis**

Tolerance = 4.0 PPM / DBE: min = 0.0, max = 50.0

Element prediction: Off

Number of isotope peaks used for i-FIT = 3

Monoisotopic Mass, Even Electron Ions

315 formula(e) evaluated with 2 results within limits (all results (up to 1000) for each mass)

Elements Used:

| Mass     | Calc. Mass | mDa  | PPM  | DBE  | Formula        | i-FIT | i-FIT Norm | Fit Conf % | C  | H  | O  | Na |
|----------|------------|------|------|------|----------------|-------|------------|------------|----|----|----|----|
| 743.4727 | 743.4734   | -0.7 | -0.9 | 10.5 | C43 H67 O10    | 444.9 | 1.606      | 20.07      | 43 | 67 | 10 |    |
|          | 743.4710   | 1.7  | 2.3  | 7.5  | C41 H68 O10 Na | 443.5 | 0.224      | 79.93      | 41 | 68 | 10 | 1  |

<miki 3rd extract meoh 10 2 2844 (5.514)AM2 (Ar,30000.0,556.28,0.00,LS 10); ABS

1: TOF MS ES+

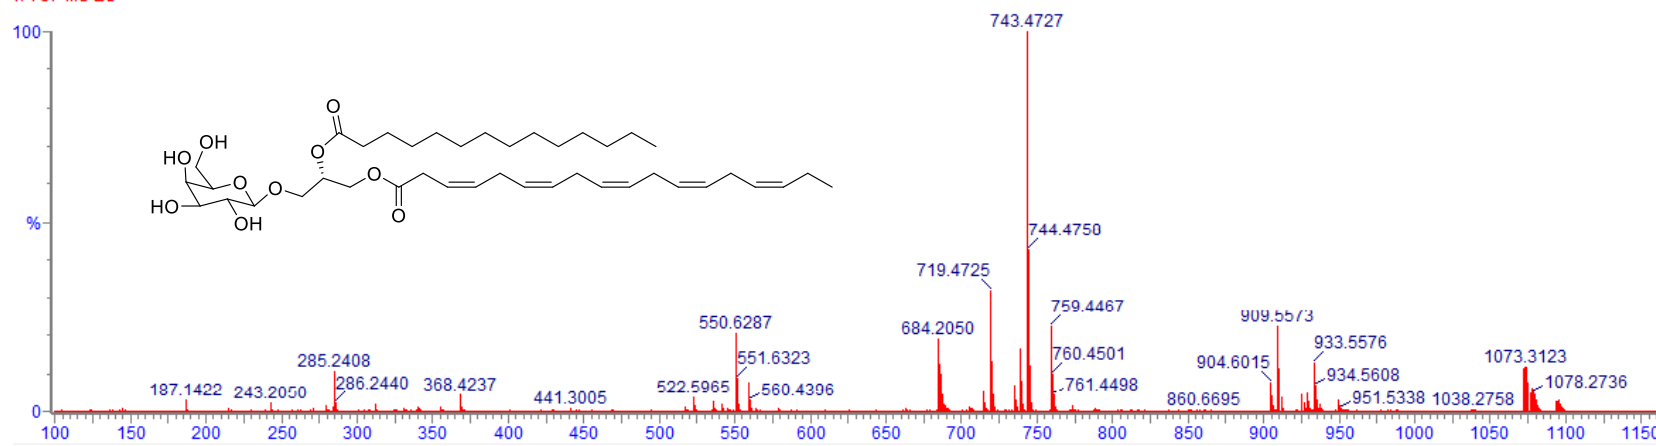

**Figure S8.** IR Spectra of Monogalactosyldiacylglycerol (**1**)

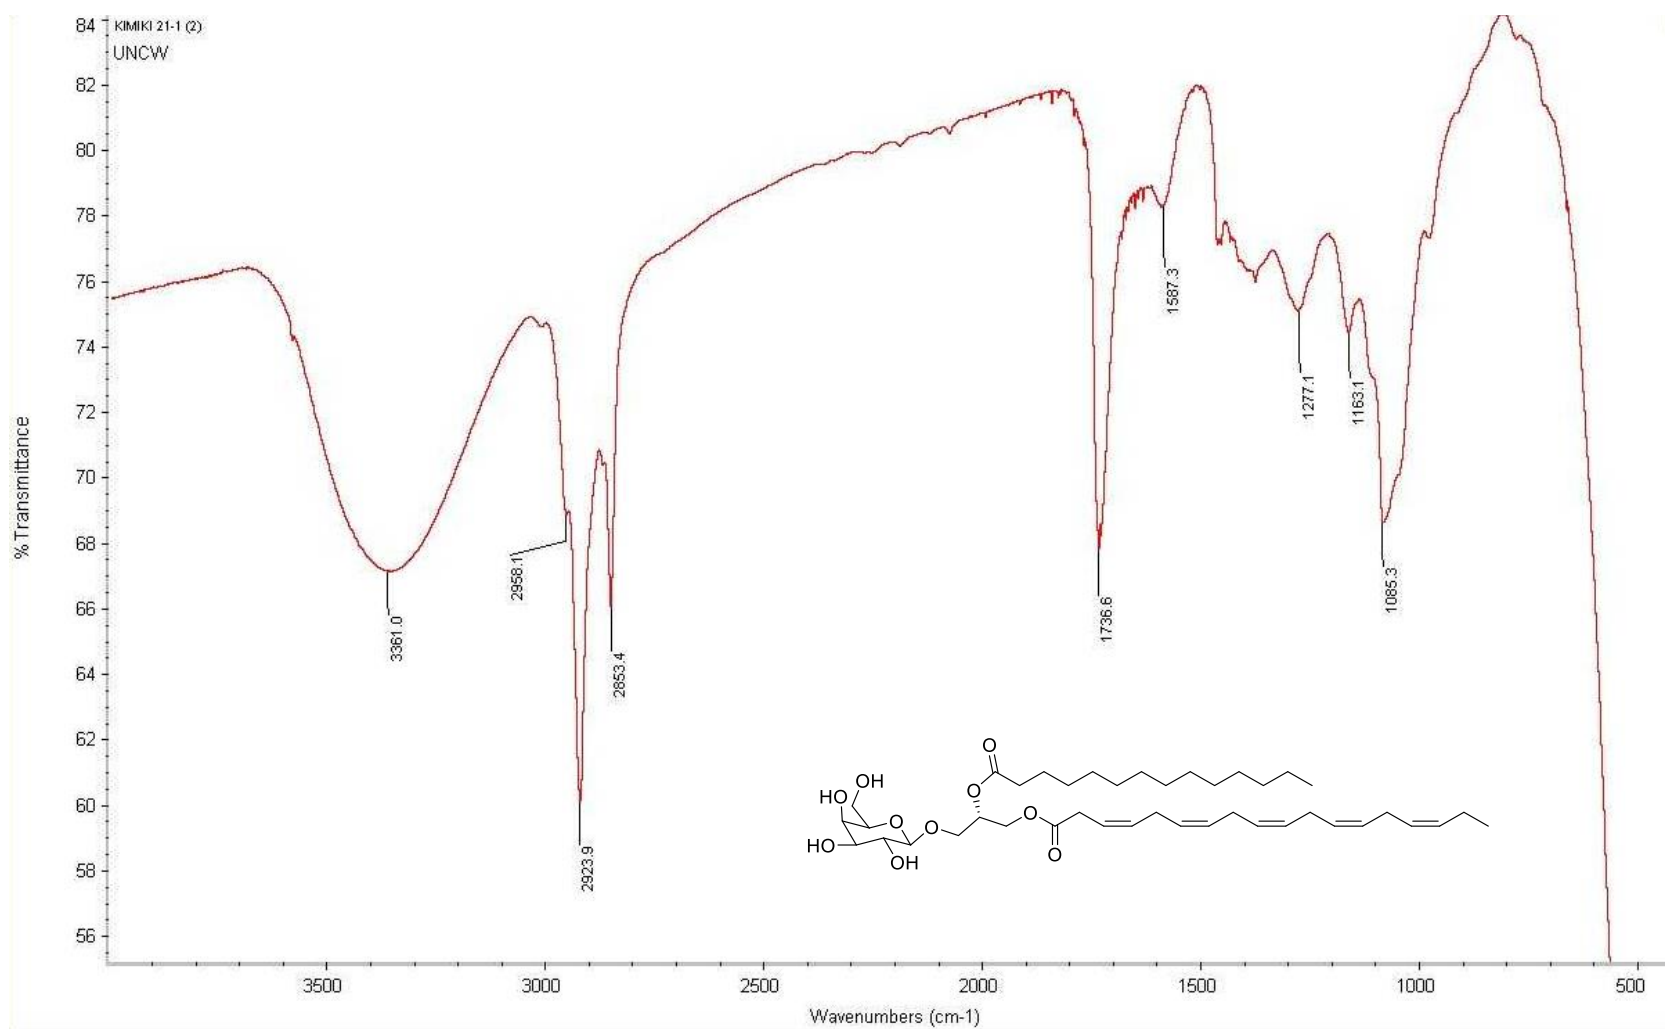

**Figure S9.** Fragmentation ESI-MS of the monogalactosyldiacylglycerol (**1**)

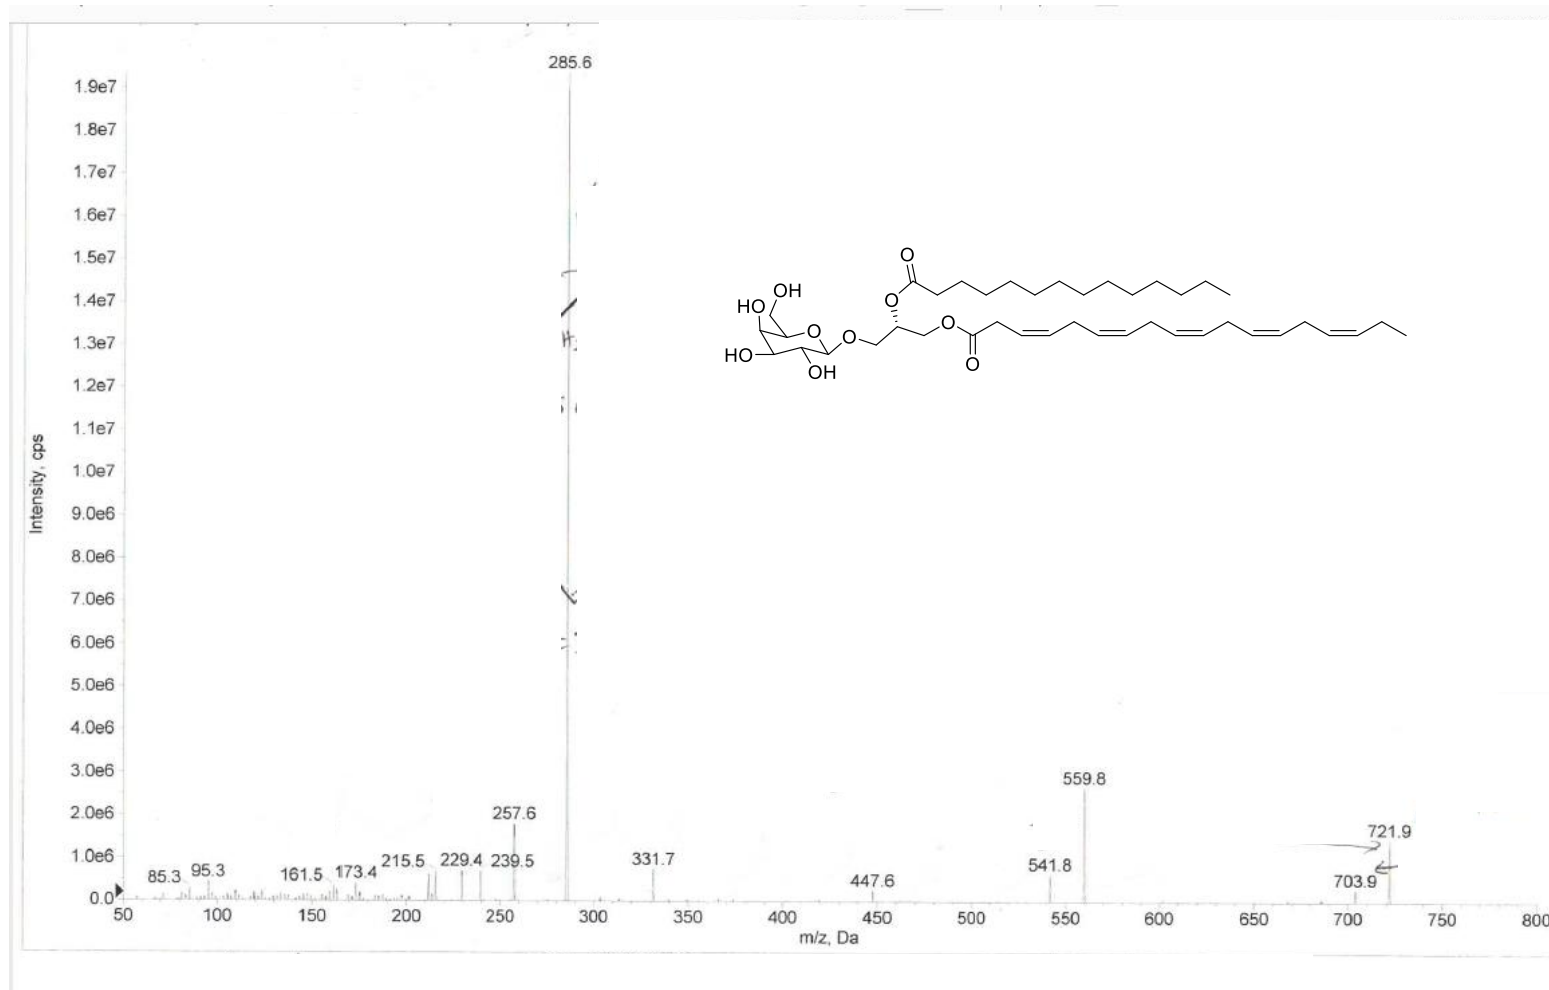

**Figure S10.**  $^1\text{H}$  NMR Spectrum (500 MHz) of Monogalactosylmonoacylglycerol (**2**) in  $\text{CD}_3\text{OD}$

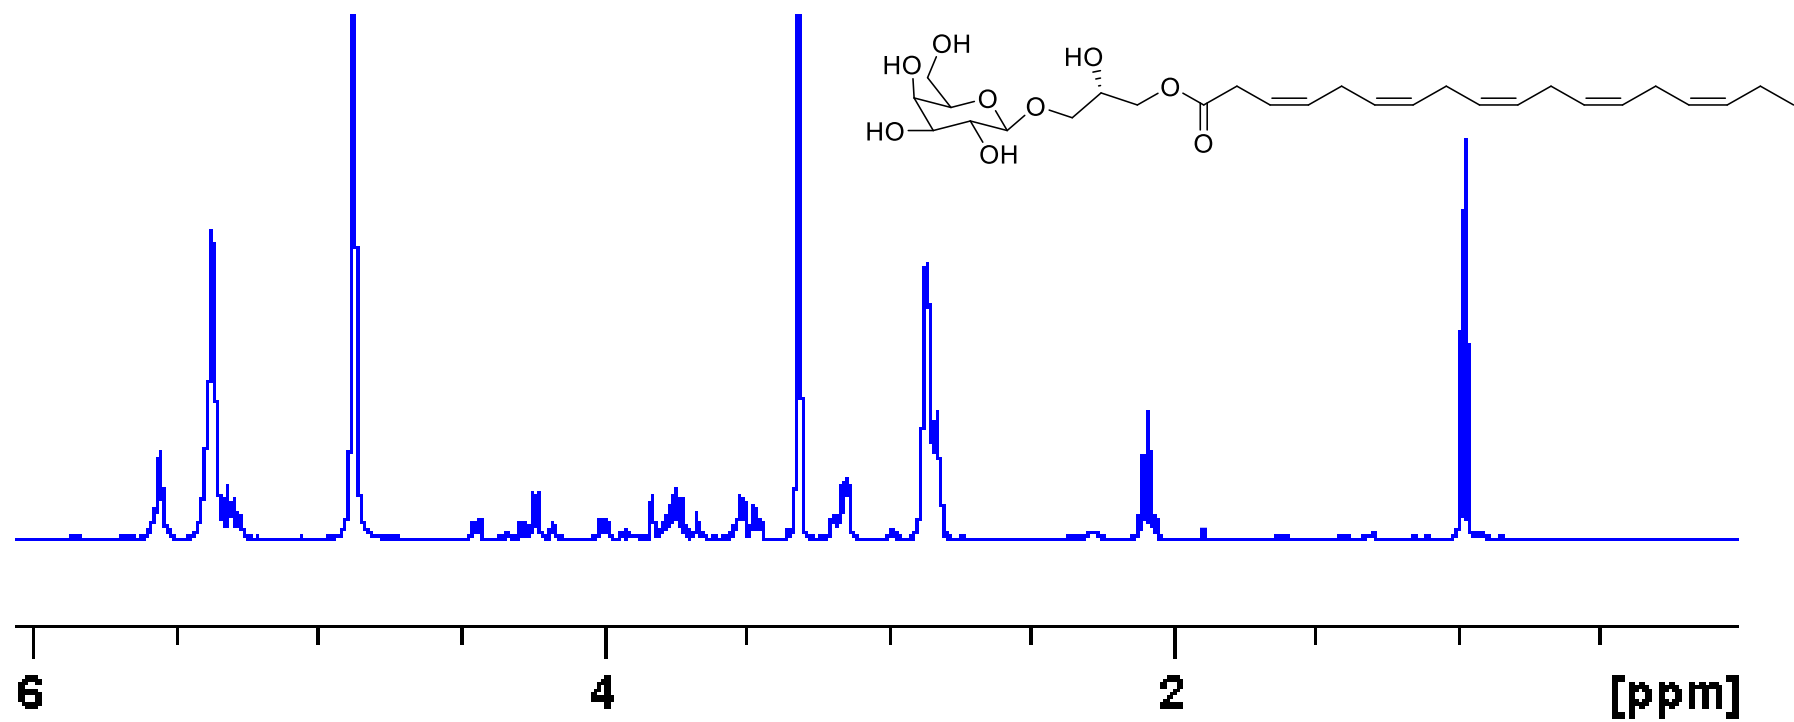

**Figure S11.**  $^{13}\text{C}$  NMR Spectrum (125 MHz) of Monogalactosylmonoacylglycerol (**2**) in  $\text{CD}_3\text{OD}$

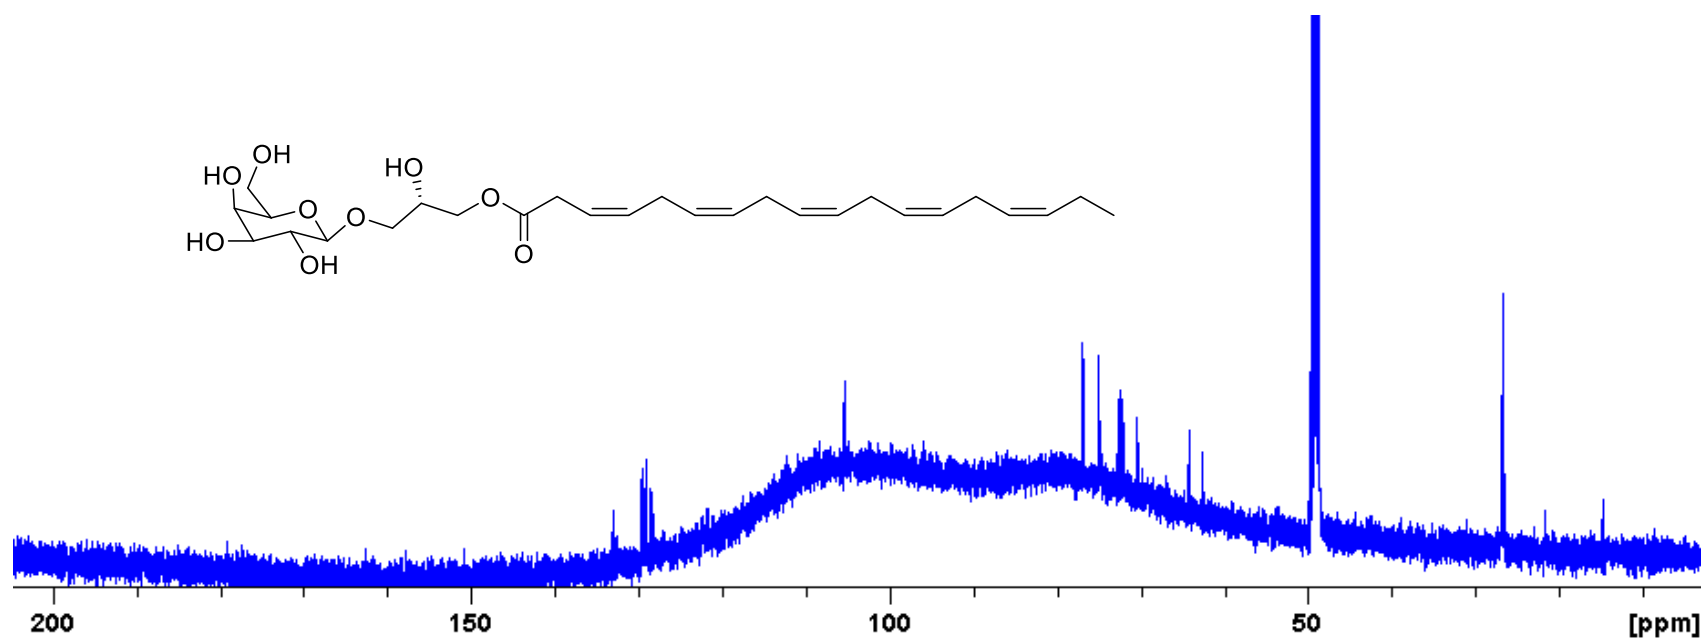

**Figure S12.** HRMS/ESI-TOF of Monogalactosylmonoacylglycerol (**2**)

**Single Mass Analysis**

Tolerance = 4.0 PPM / DBE: min = 0.0, max = 50.0

Element prediction: Off

Number of isotope peaks used for i-FIT = 3

Monoisotopic Mass, Odd and Even Electron Ions

208 formula(e) evaluated with 1 results within limits (all results (up to 1000) for each mass)

Elements Used:

| Mass     | Calc. Mass | mDa | PPM | DBE | Formula                                           | i-FIT | i-FIT Norm | Fit Conf % | C  | H  | O | Na |
|----------|------------|-----|-----|-----|---------------------------------------------------|-------|------------|------------|----|----|---|----|
| 533.2727 | 533.2727   | 0.0 | 0.0 | 6.5 | C <sub>27</sub> H <sub>42</sub> O <sub>9</sub> Na | 276.3 | n/a        | n/a        | 27 | 42 | 9 | 1  |

msms 533 pos ce40  
1533msms 109 (1.090)

1: TOF MSMS!

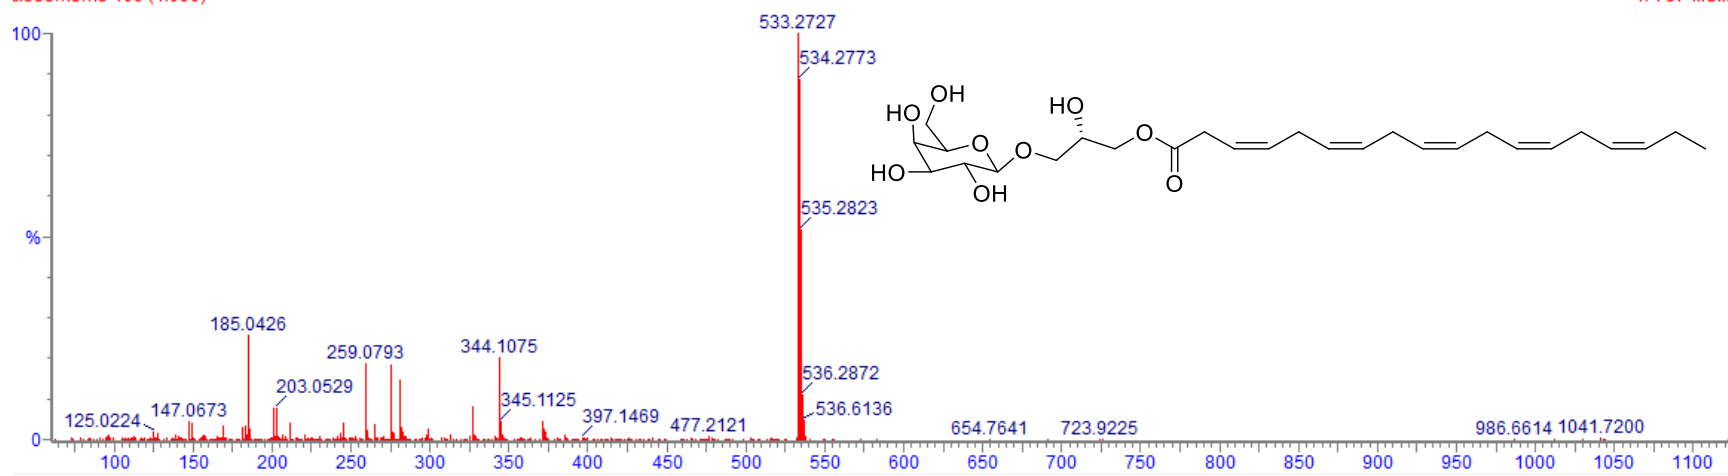

**Figure S13.**  $^1\text{H}$  NMR Spectrum (500 MHz) of Polyunsaturated fatty acid methyl ester (**3**) in  $\text{CD}_3\text{OD}$

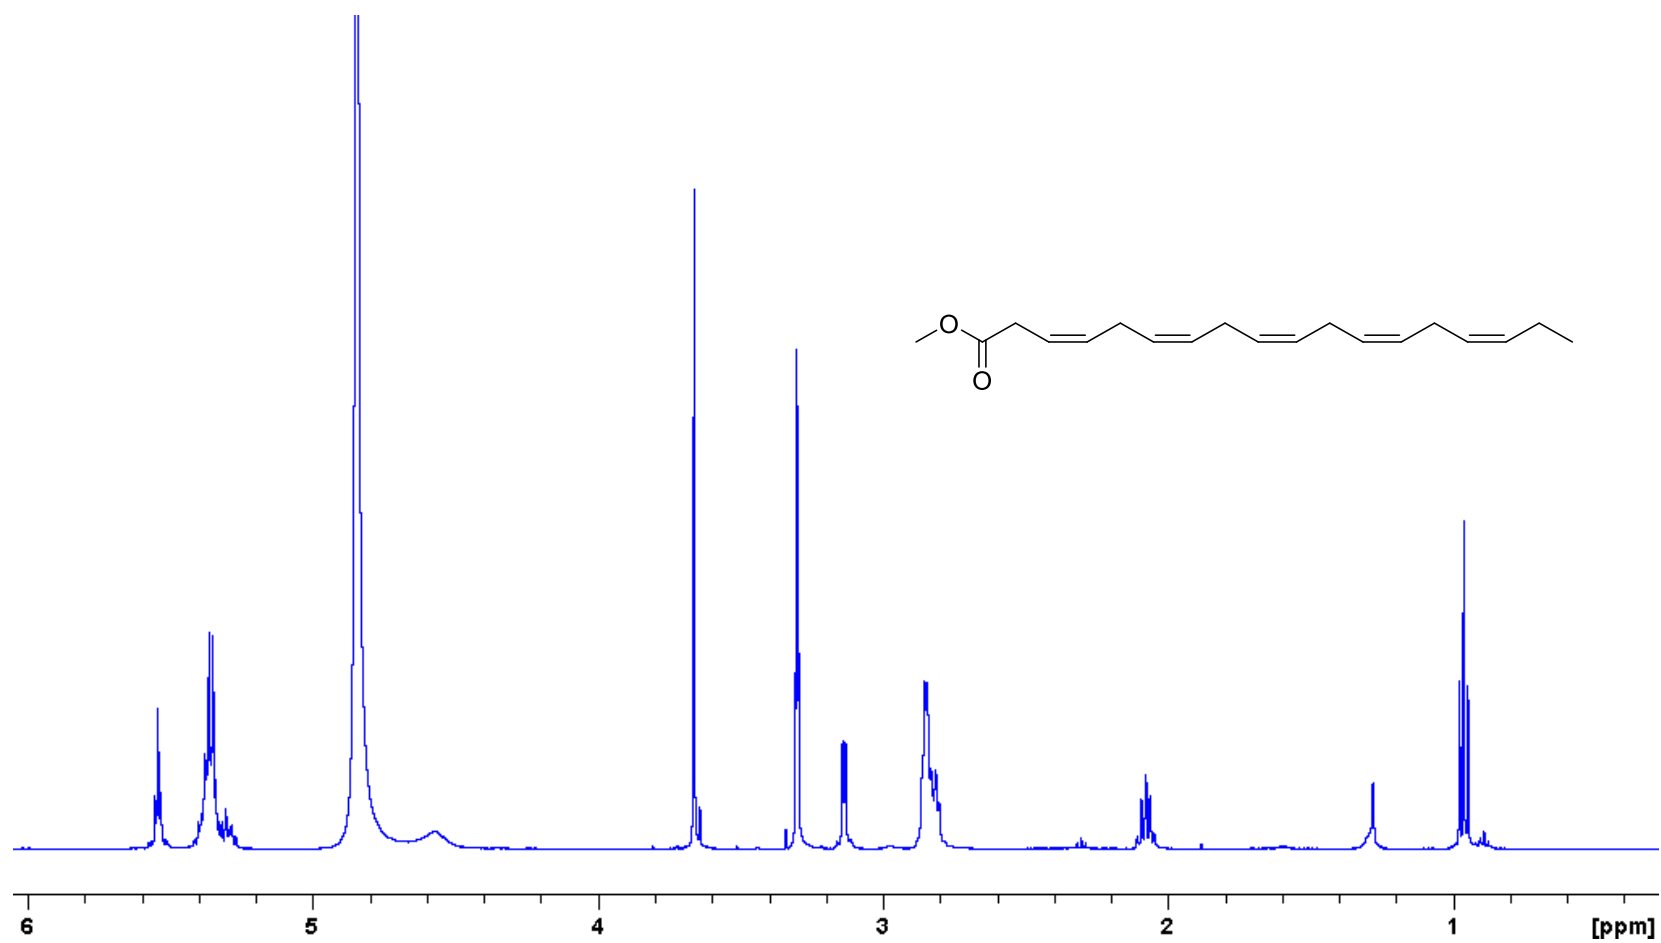

**Figure S14.**  $^{13}\text{C}$  NMR Spectrum (125 MHz) of Polyunsaturated fatty acid methyl ester (**3**) in  $\text{CD}_3\text{OD}$

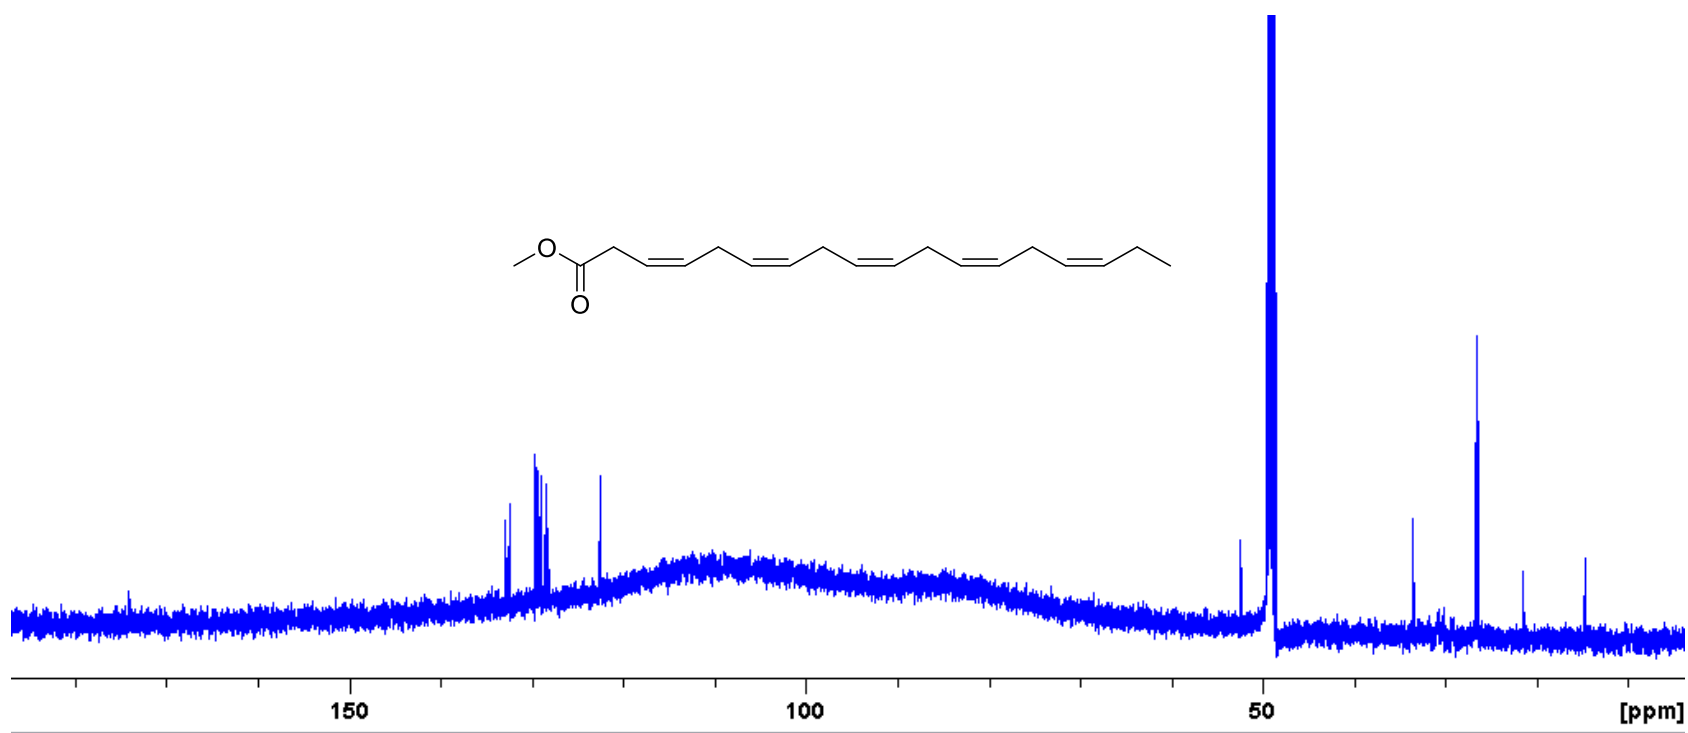



**Figure S15.** HRMSEITOF of Polyunsaturated fatty acid methyl ester (**3**)

**Single Mass Analysis**

Tolerance = 4.0 PPM / DBE: min = 0.0, max = 50.0

Element prediction: Off

Number of isotope peaks used for i-FIT = 3

Monoisotopic Mass, Even Electron Ions

84 formula(e) evaluated with 1 results within limits (all results (up to 1000) for each mass)

Elements Used:

| Mass     | Calc. Mass | mDa | PPM | DBE | Formula    | i-FIT | i-FIT Norm | Fit Conf % | C  | H  | O | Na |
|----------|------------|-----|-----|-----|------------|-------|------------|------------|----|----|---|----|
| 289.2169 | 289.2168   | 0.1 | 0.3 | 5.5 | C19 H29 O2 | 815.8 | n/a        | n/a        | 19 | 29 | 2 |    |

kmiki 3rd extract meoh 9 1 1983 (3.852) AM2 (Ar,30000.0,556.28,0.00,LS 10); ABS

1: TOF MS ES+

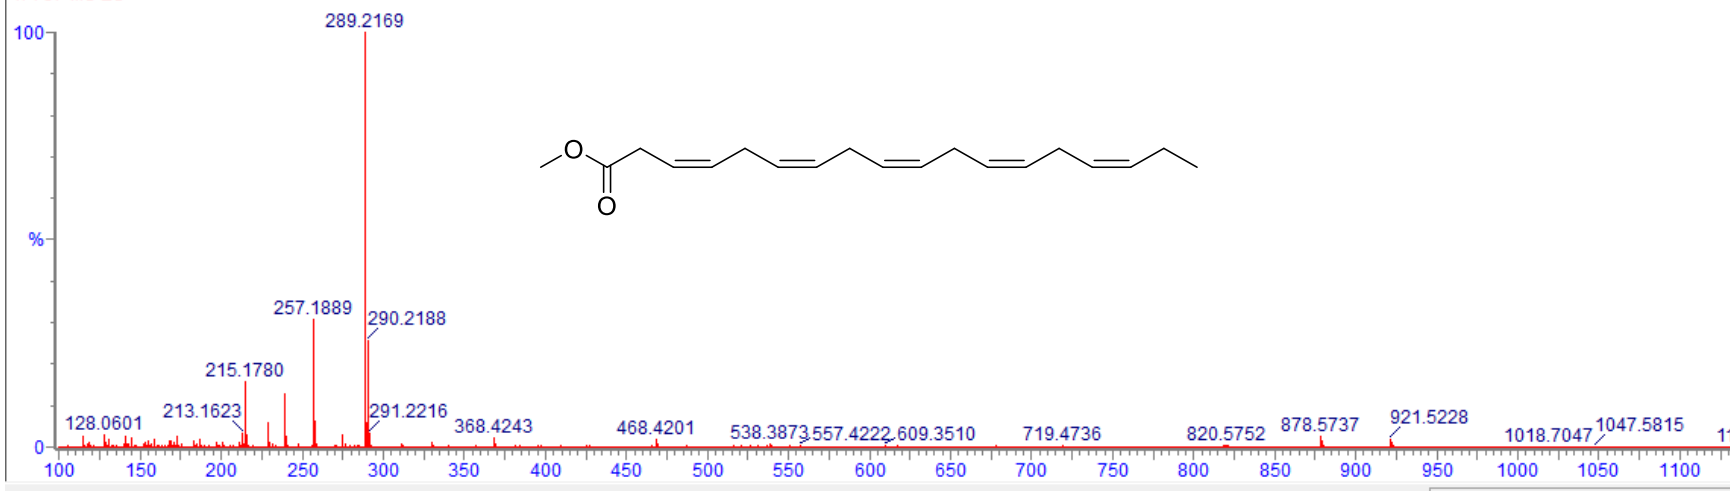

Supplement: marinedrugs-18-00138-s001.pdf [file marinedrugs-18-00138-s001.pdf]
